# Supplementary material
Source: PubMed Central journal article supplement (PMC2957466)
Supplement: 00099.2010_1.pdf [file 00099.2010_1.pdf]

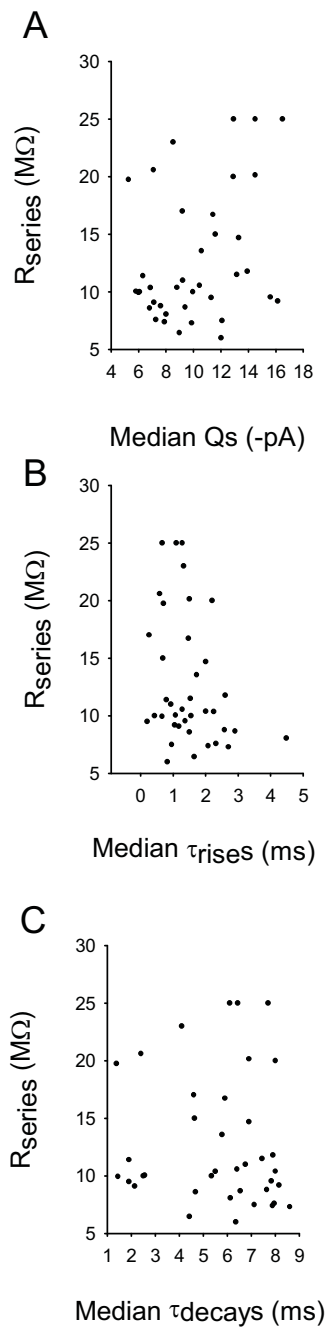

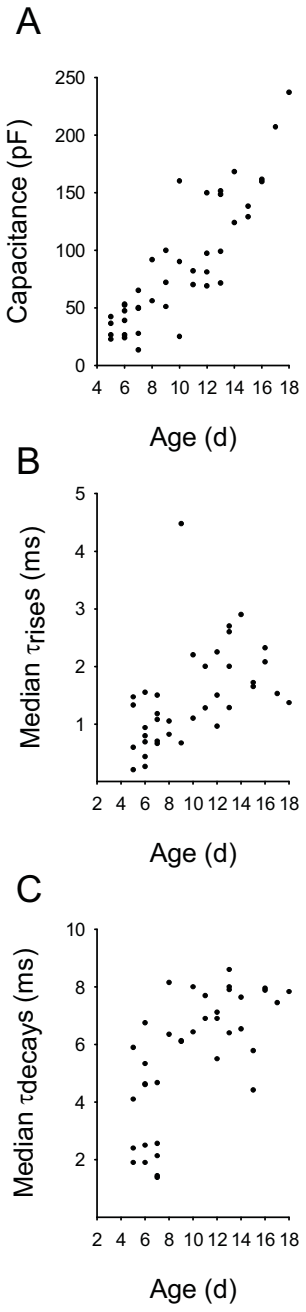

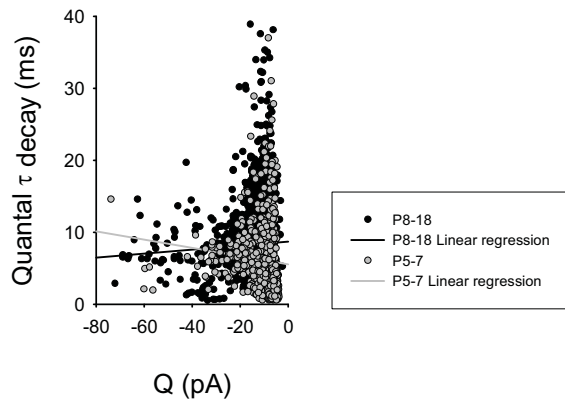

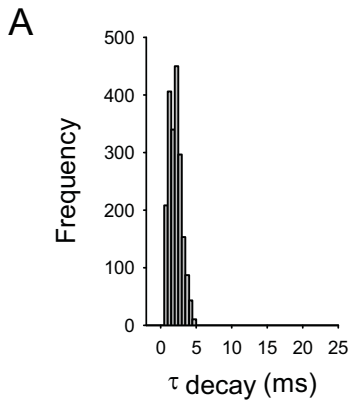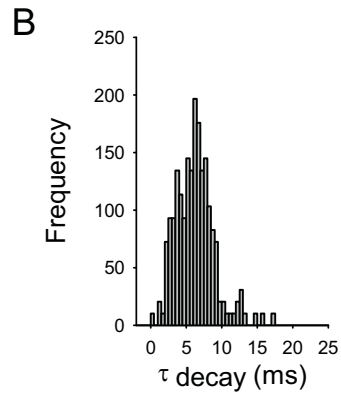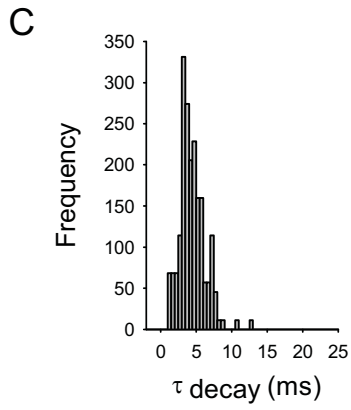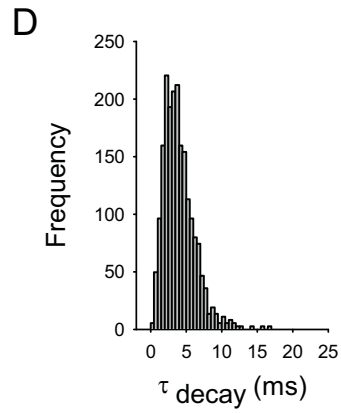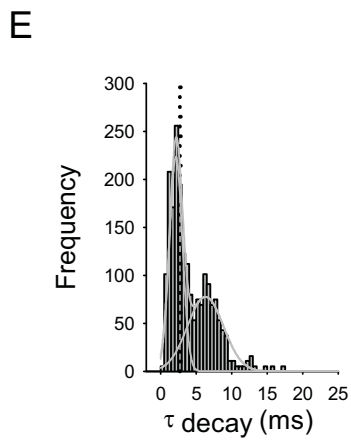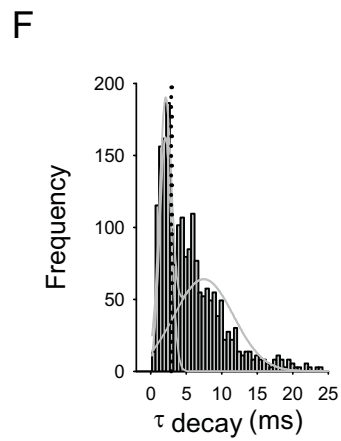

1 **Supplemental Figure 1: AMPAR-mediated Q,  $\tau_{\text{rise}}$ , and  $\tau_{\text{decay}}$  were independent of**  
2 **series resistance.** A. Median Qs did not correlate with series resistance (n=38). B.  
3 Median  $\tau_{\text{rise}}$ s were unaffected by series resistances recorded (n=38). C. Median  $\tau_{\text{decay}}$ s  
4 were unaffected by series resistances recorded (n=38).

5  
6 **Supplemental Figure 2: Only AMPAR-mediated  $\tau_{\text{rise}}$  was affected by filtering.** A.  
7 Cell capacitance, an estimate of cell size, increased steadily during the developmental  
8 window examined from P5-18 (n=38). B. Similar to cell capacitance, median  $\tau_{\text{rise}}$ s  
9 steadily increased with development (n=38), suggesting that these parameters were  
10 related. C. Scatter plot of median  $\tau_{\text{decay}}$ s across all developmental time points P5-P18  
11 also showed an opposing relationship compared to age and, therefore, cell capacitance,  
12 suggesting that median  $\tau_{\text{decay}}$ s were not influenced by cell capacitance and likely filtering  
13 in the same way as median  $\tau_{\text{rise}}$ s.

14  
15 **Supplemental Figure 3. Correlation of quantal amplitudes (Q) and quantal  $\tau_{\text{decay}}$**   
16 **for individual, pooled events at P5-7 and P8-18.** Quantal  $\tau_{\text{decay}}$  and Q (732 events)  
17 pooled from neurons (n = 15) at P5-7 were plotted (grey circles) and compared to P8-18  
18 (1985 events, n = 23 neurons, black circles) to determine whether these two parameters  
19 were related. Q and quantal  $\tau_{\text{decay}}$  did not appear correlated at either age based on  
20 regression lines for events at P5-7 (grey line,  $r^2 = 0.0027$ ) and P8-18 (black line,  $r^2 =$   
21  $0.0015$ ).

22  
23 **Supplemental Figure 4. Modeling sources of variability of CV  $\tau_{\text{decay}}$  to demonstrate**  
24 **that distinct synapses with different kinetics best describe experimental**  
25 **distributions of quantal  $\tau_{\text{decay}}$ .** AMPARs were modeled with a detailed macroscopic  
26 kinetic scheme (67). Rate constants and channel conductances for AMPARs were as  
27 published except the closing rate ( $\alpha$ ) was adjusted to give different rates for mean quantal  
28  $\tau_{\text{decay}}$ . In order to simulate the variability of peak glutamate concentration in the synaptic  
29 cleft, it was assumed that glutamate was released from vesicles containing 80 mM  
30 glutamate with a mean radius of 17nm with a standard deviation of 7.5 nm (which is  
31 three times reported values (32) in order to maximize variability) into a synaptic cleft  
32 volume of 9 aL. The resulting exponential distribution of glutamate cleft concentrations  
33 had a mean of 0.3 mM. Stochastic AMPARs, simulated with the Monte Carlo technique  
34 as done previously (2), when activated by a glutamate pulse with a peak time of 2  $\mu$ s and  
35 decay time of 1 ms, resulted in a average response  $\tau_{\text{decay}}$  of 6.1 ms with  $\alpha = 300\text{s}^{-1}$  and  
36 average response  $\tau_{\text{decay}}$  of 2.1 ms with  $\alpha = 900\text{s}^{-1}$ . Total AMPAR numbers were fixed at  
37 25 to result in mean simulated Q (-12 pA at -70 mV) similar to experimental results.  
38 Random noise (2 pA rms) was added to ensembles of 250-1000 modeled synaptic  
39 AMPAR responses; filtering (Gaussian low-pass of 2 kHz) did not significantly alter  
40 results. Modeled  $\text{CV}_Q$  (0.37) was similar to that found experimentally. Empiric  
41 Gaussian distributions from non-binned event data were fitted with a maximum  
42 likelihood estimator via a simplex method(72). Five different scenarios were tested in  
43 order to investigate the source of variability of quantal  $\tau_{\text{decay}}$ . Responses were analyzed  
44 in a similar fashion to experimental data. A. In the first scenario, all 25 AMPARs were  
45 given  $\alpha = 900\text{s}^{-1}$ . This resulted in a  $\text{CV}\tau_{\text{decay}}$  of 0.42 and a median quantal  $\tau_{\text{decay}}$  of 2.0  
46 ms (250 trials). B. In the second scenario, all 25 AMPARs were given  $\alpha = 300\text{s}^{-1}$ . This

47 resulted in a  $CV_{\tau_{\text{decay}}}$  of 0.44 and a median quantal  $\tau_{\text{decay}}$  of 6.1 ms (250 trials). C. In the  
48 third scenario, 13 AMPARs had  $\alpha = 900 \text{ s}^{-1}$  and 12 AMPARs had  $\alpha = 300 \text{ s}^{-1}$ . This  
49 resulted in a  $CV_{\tau_{\text{decay}}}$  of 0.40, a median quantal  $\tau_{\text{decay}}$  of 4.5 ms and no nadir of separation  
50 seen (250 trials). D. In the fourth scenario, AMPAR were randomized with a uniform  
51 probability distribution to have either  $\alpha = 900 \text{ s}^{-1}$  or  $\alpha = 300 \text{ s}^{-1}$ . As expected, this  
52 resulted in a median  $\tau_{\text{decay}}$  between the distributions in (A) and (B) (3.6 ms) and did not  
53 show peaks or nadirs; however,  $CV_{\tau_{\text{decay}}}$  was increased to 0.55 (1000 trials). E. In the  
54 final scenario, the responses with  $\alpha = 900 \text{ s}^{-1}$  (A) and  $\alpha = 300 \text{ s}^{-1}$  (B) were pooled to  
55 simulate two independent AMPAR synapses (i.e. each activated with equal probability)  
56 with different kinetics. Peaks and a nadir appeared in the distribution of quantal  $\tau_{\text{decay}}$   
57 with median  $\tau_{\text{decay}}$  of 4.2 ms and  $CV_{\tau_{\text{decay}}}$  of 0.69, similar to that seen experimentally at  
58 P5-7 (c.f. Fig. 5A). However, Hartigan's Dip test did not identify significant  
59 multimodality ( $D = 0.18$ ,  $p \approx 0.8$ , modal break (2.7 ms) indicated by dotted line), even  
60 though the distribution appeared multimodal and was generated from two distributions.  
61 Fitted Gaussian distributions (solid grey lines) segregated 51% faster events with mean of  
62 2.1 ms ( $\sigma = 0.9$  ms) from 49% slower events with mean of 6.3 ms ( $\sigma = 2.5$  ms),  
63 consistent with equal contributions from the 2 independent synapses. F. Pooled quantal  
64  $\tau_{\text{decay}}$  events from all neurons at P5-7 suggested 2 distributions but did not have a  
65 significant Dip test ( $D = 0.011$ , 732 events,  $p \approx 0.9$ , modal break (2.9 ms) indicated by  
66 dotted line). Fitted Gaussian distributions (solid grey lines) segregated 33% faster events  
67 with mean of 2.1 ms ( $\sigma = 0.8$  ms) from 67% slower events with mean of 7.5 ms ( $\sigma = 4.2$   
68 ms). If there are 2 synapse types, "faster" and "slower", with equal release probabilities  
69 (c.f. Fig. 2A,B), this suggest that approximately 30% of activated synapses at P5-7 are  
70 distinct and "faster".
